# Supplementary material for: Gender differences in clinical and prescribing characteristics of biologic and targeted synthetic drugs in naïve patients with rheumatoid arthritis. Data from BIOBADASER III registry
Source: Research Square preprint supplement (doi:10.21203/rs.3.rs-5263001/v1), 2025-04-15
Supplement: Supplementary file 1 [file 8df0e8d86428c375d435502c.docx]

SUPPLEMENTARY MATERIAL

**Supplementary table 1. Linear regression models (detailed) for DAS28 and its different components, with sex as explanatory variable (adjusted for age at treatment initiation, Charlson comorbidity index, BMI, and Sjögren's syndrome)**

|  | **DAS28-ESR** | | | **DAS28-CRP** | | |
| --- | --- | --- | --- | --- | --- | --- |
|  | **Coefficient** | **(95% CI)** | **p value** | **Coefficient** | **(95% CI)** | **p value** |
| **Female sex (ref. male sex)** | 0.36 | (0.24; 0.47) | **<0.001** | 0.09 | (-0.03; 0.20) | 0.131 |
| Age at treatment start | 0.01 | (0.00; 0.01) | 0.001 | 0.00 | (0.00; 0.01) | 0.094 |
| Charlson comorbidity index | 0.10 | (0.04; 0.15) | 0.001 | 0.06 | (0.01; 0.11) | 0.029 |
| BMI (ref. normal weight) |  |  |  |  |  |  |
| Overweight | 0.03 | (-0.09; 0.15) | 0.579 | 0.02 | (-0.09; 0.13) | 0.712 |
| Obesity | 0.11 | (-0.02; 0.24) | 0.112 | 0.08 | (-0.04; 0.20) | 0.192 |
| Sjögren’s Syndrome | 0.19 | (-0.09; 0.47) | 0.19 | -0.03 | (-0.29; 0.24) | 0.852 |
|  | **Tender joint count** | | | **Swollen joint count** | | |
|  | **Coefficient** | **(95% CI)** | **p value** | **Coefficient** | **(95% CI)** | **p value** |
| **Female sex (ref. male sex)** | 0.68 | (0.12; 1.24) | **0.017** | -0.01 | (-0.42; 0.40) | 0.953 |
| Age at treatment start | -0.01 | (-0.03; 0.01) | 0.427 | 0.01 | (-0.01; 0.02) | 0.482 |
| Charlson comorbidity index | 0.22 | (-0.04; 0.49) | 0.102 | 0.28 | (0.09; 0.48) | 0.005 |
| BMI (ref. normal weight) |  |  |  |  |  |  |
| Overweight | -0.17 | (-0.74; 0.40) | 0.563 | -0.44 | (-0.86; -0.02) | 0.039 |
| Obesity | -0.35 | (-0.95; 0.26) | 0.262 | -0.81 | (-1.26; -0.36) | <0.001 |
| Sjögren’s Syndrome | 0.20 | (-1.14; 1.54) | 0.771 | 0.57 | (-0.42; 1.56) | 0.256 |
|  | **ESR** | | | **CRP** | | |
|  | **Coefficient** | **(95% CI)** | **p value** | **Coefficient** | **(95% CI)** | **p value** |
| **Female sex (ref. male sex)** | 5.22 | (3.01; 7.43) | **<0.001** | -3.63 | (-6.90; -0.37) | **0.029** |
| Age at treatment start | 0.23 | (0.16; 0.31) | <0.001 | 0.17 | (0.06; 0.29) | 0.003 |
| Charlson comorbidity index | 2.8 | (1.75; 3.85) | <0.001 | 0.48 | (-1.09; 2.06) | 0.546 |
| BMI (ref. normal weight) |  |  |  |  |  |  |
| Overweight | 2.13 | (-0.11; 4.37) | 0.063 | 0.11 | (-3.22; 3.43) | 0.95 |
| Obesity | 4.31 | (1.90; 6.72) | <0.001 | -1.00 | (-4.57; 2.56) | 0.581 |
| Sjögren’s Syndrome | 6.20 | (0.97; 11.43) | **0.02** | -0.27 | (-7.97; 7.43) | 0.946 |
|  | **PGA-VAS** | | |  |  |  |
|  | **Coefficient** | **(95% CI)** | **p value** |  |  |  |
| **Female sex (ref. male sex)** | 0.38 | (0.16; 0.59) | **0.001** |  |  |  |
| Age at treatment start | 0.00 | (-0.01; 0.01) | 0.778 |  |  |  |
| Charlson comorbidity index | 0.05 | (-0.05; 0.15) | 0.328 |  |  |  |
| BMI (ref. normal weight) |  |  |  |  |  |  |
| Overweight | 0.19 | (-0.03; 0.41) | 0.084 |  |  |  |
| Obesity | 0.48 | (0.25; 0.72) | <0.001 |  |  |  |
| Sjögren’s Syndrome | 0.03 | (-0.48; 0.55) | 0.895 |  |  |  |

Abbreviations – DAS: disease activity score; BMI: body mass index; CI: confidence interval; TJC: tender joint count; SJC: swollen joint count; PGA-VAS: patient global assessment visual analogue scale; ESR: erythrocyte sedimentation rate; CRP: C-reactive protein
